# Supplementary material for: Investigation of An Extreme Rainfall Event during 8–12 December 2018 over Central Vietnam. Part I: Analysis and Cloud-Resolving Simulation
Source: Copernicus journal article supplement (doi:10.5194/nhess-2022-82), 2022-05-09
Supplement: Supplementary file 1 [file nhess-2022-82-supplement.pdf]

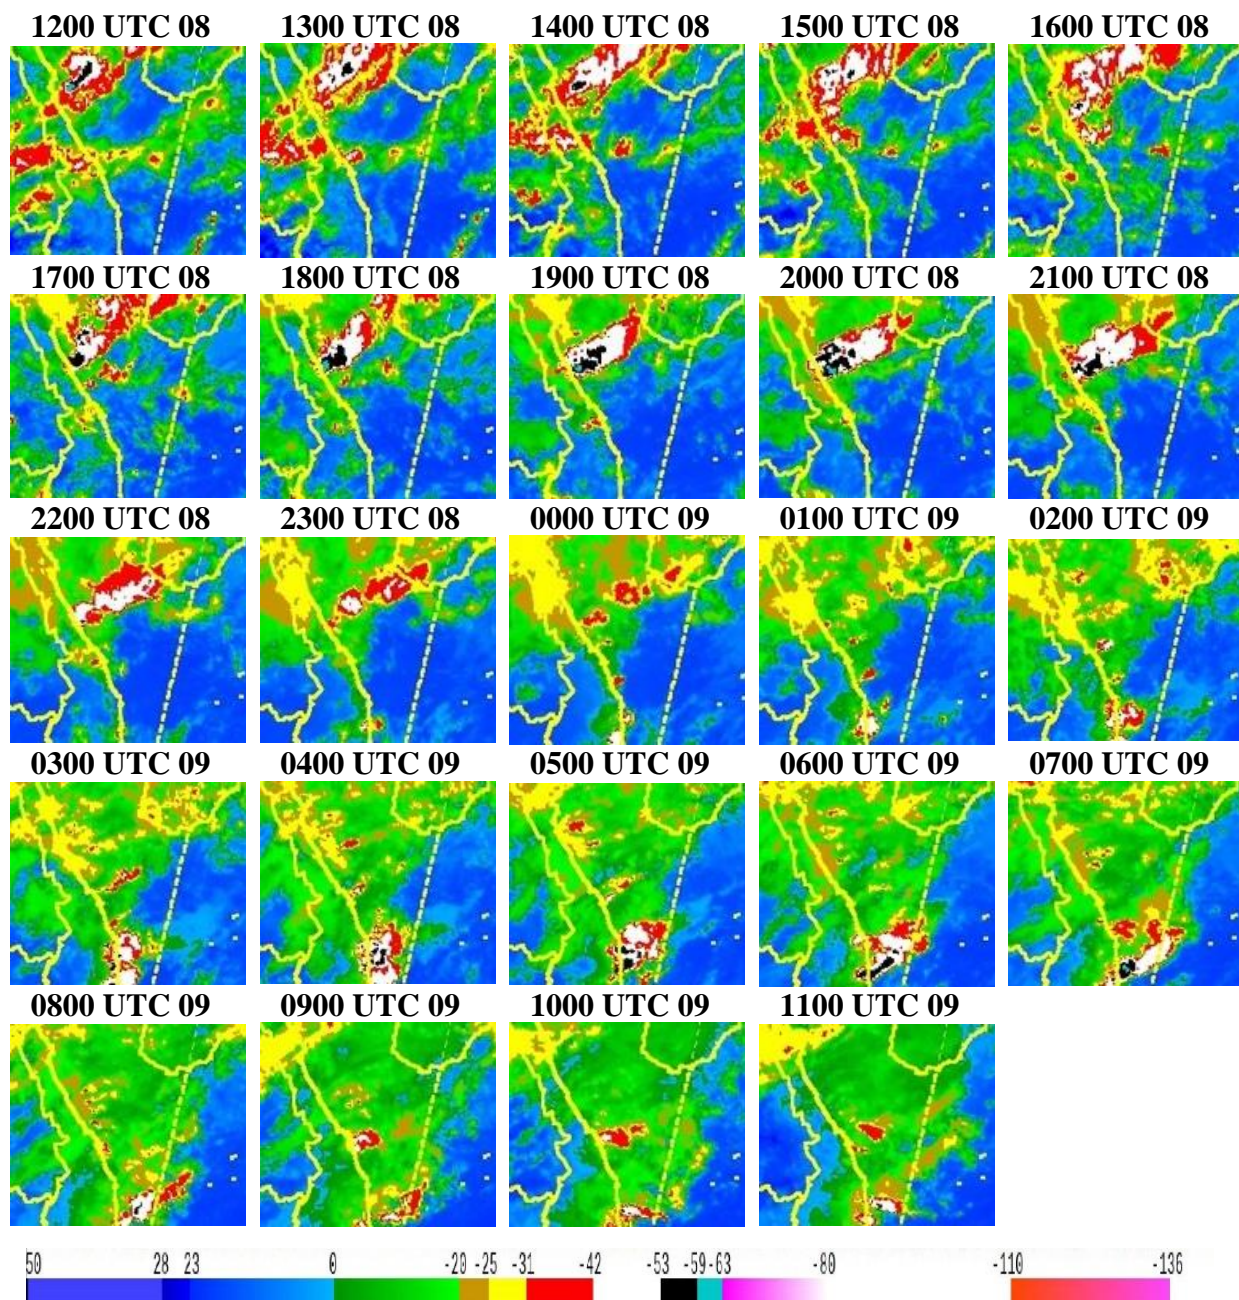

**Figure S1.** Color-enhanced infrared imageries of blackbody cloud-top temperatures ( $^{\circ}\text{C}$ , scale at bottom) over central Vietnam from the Himawari satellite at 1-h intervals from 1200 UTC 8 to 1100 UTC 9 Dec 2018.

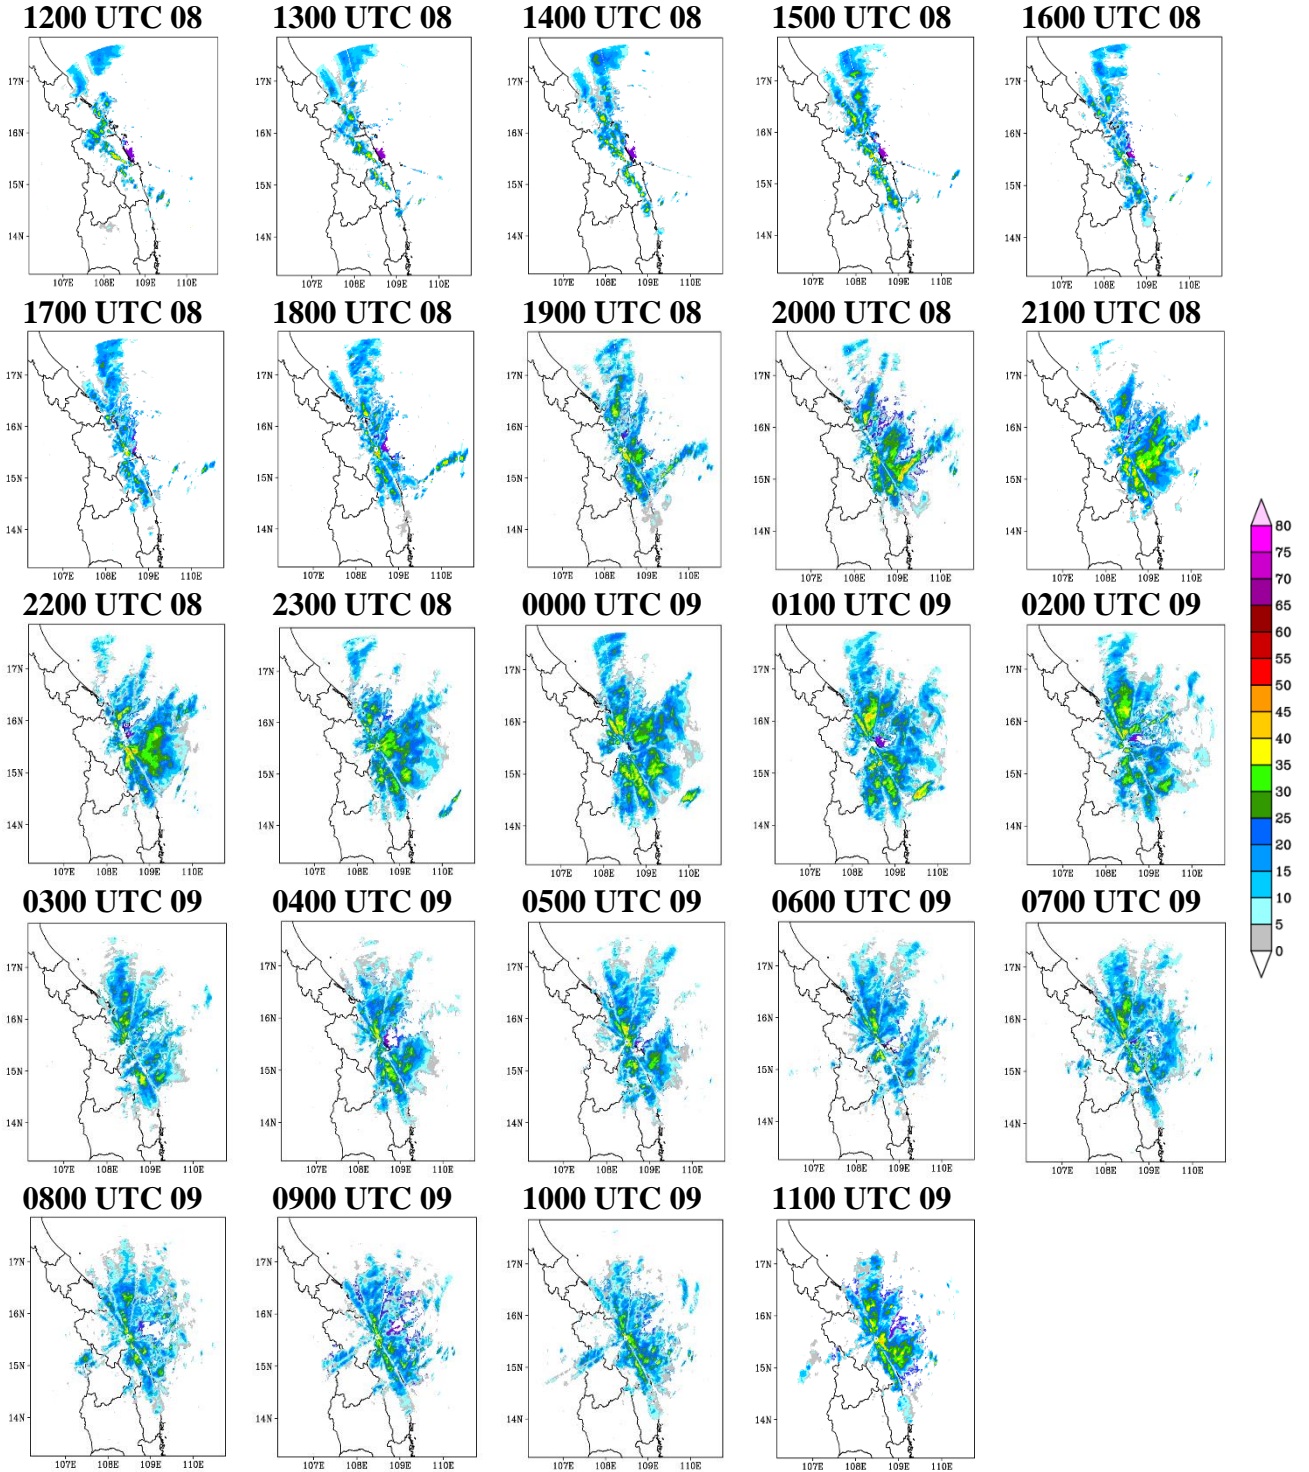

**Figure S2.** Column-maximum radar reflectivity (dBZ) over central Vietnam at 1-h intervals from 1200 UTC 8 to 1100 UTC 9 December 2018.



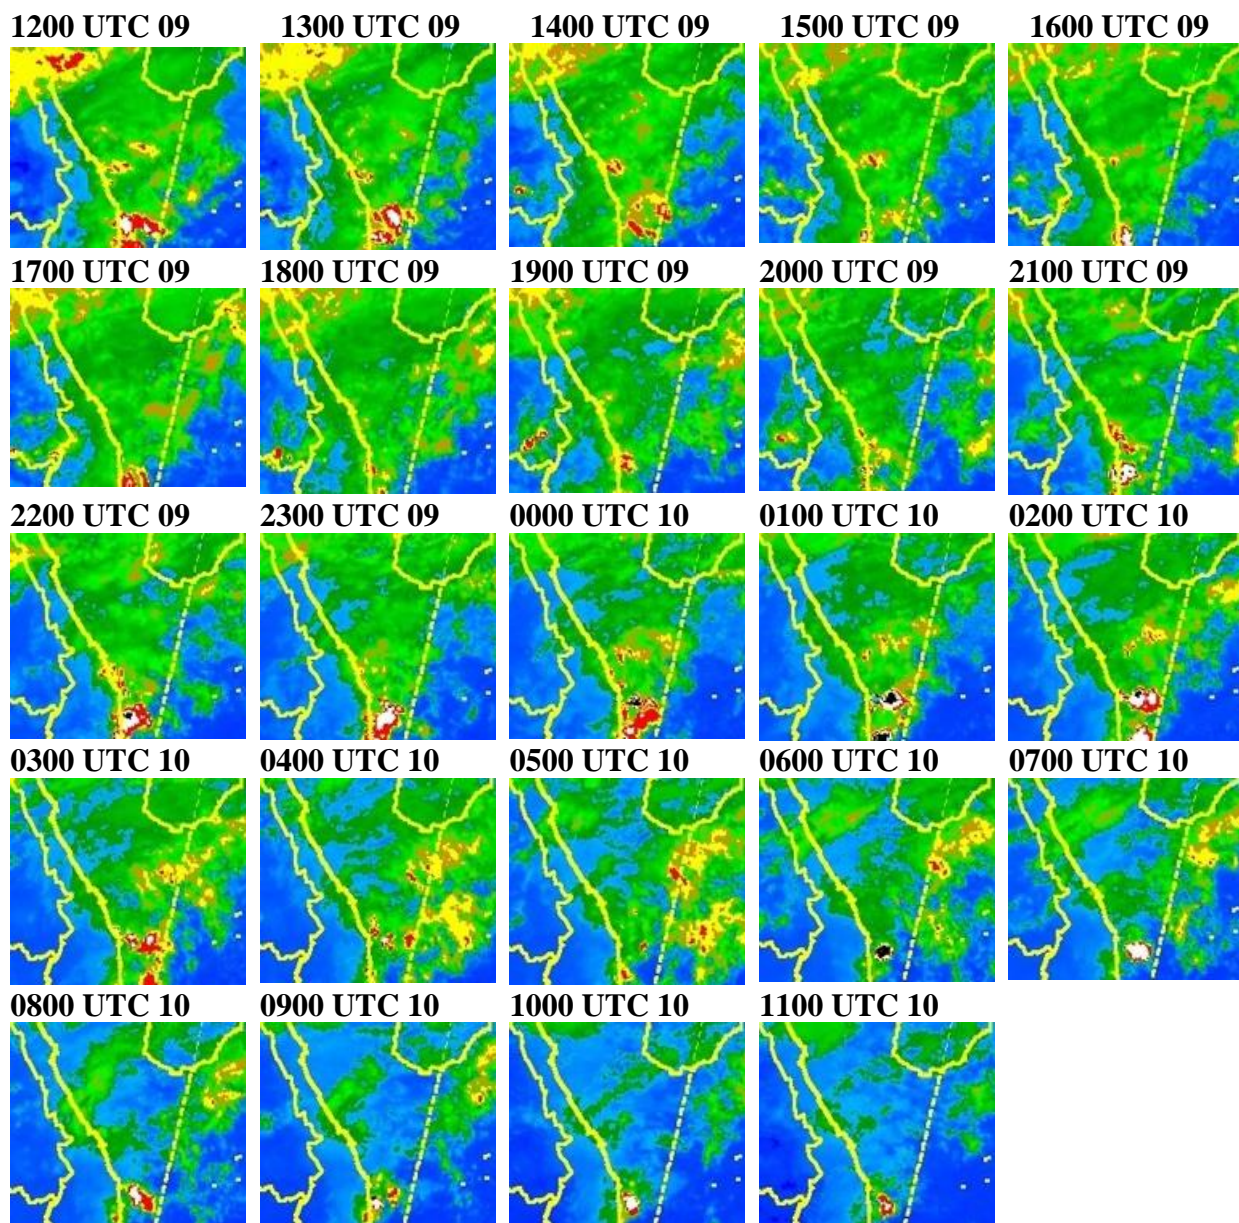

**Figure S3.** As in Fig. S1, except from 1200 UTC 9 to 1100 UTC 10 Dec 2018.

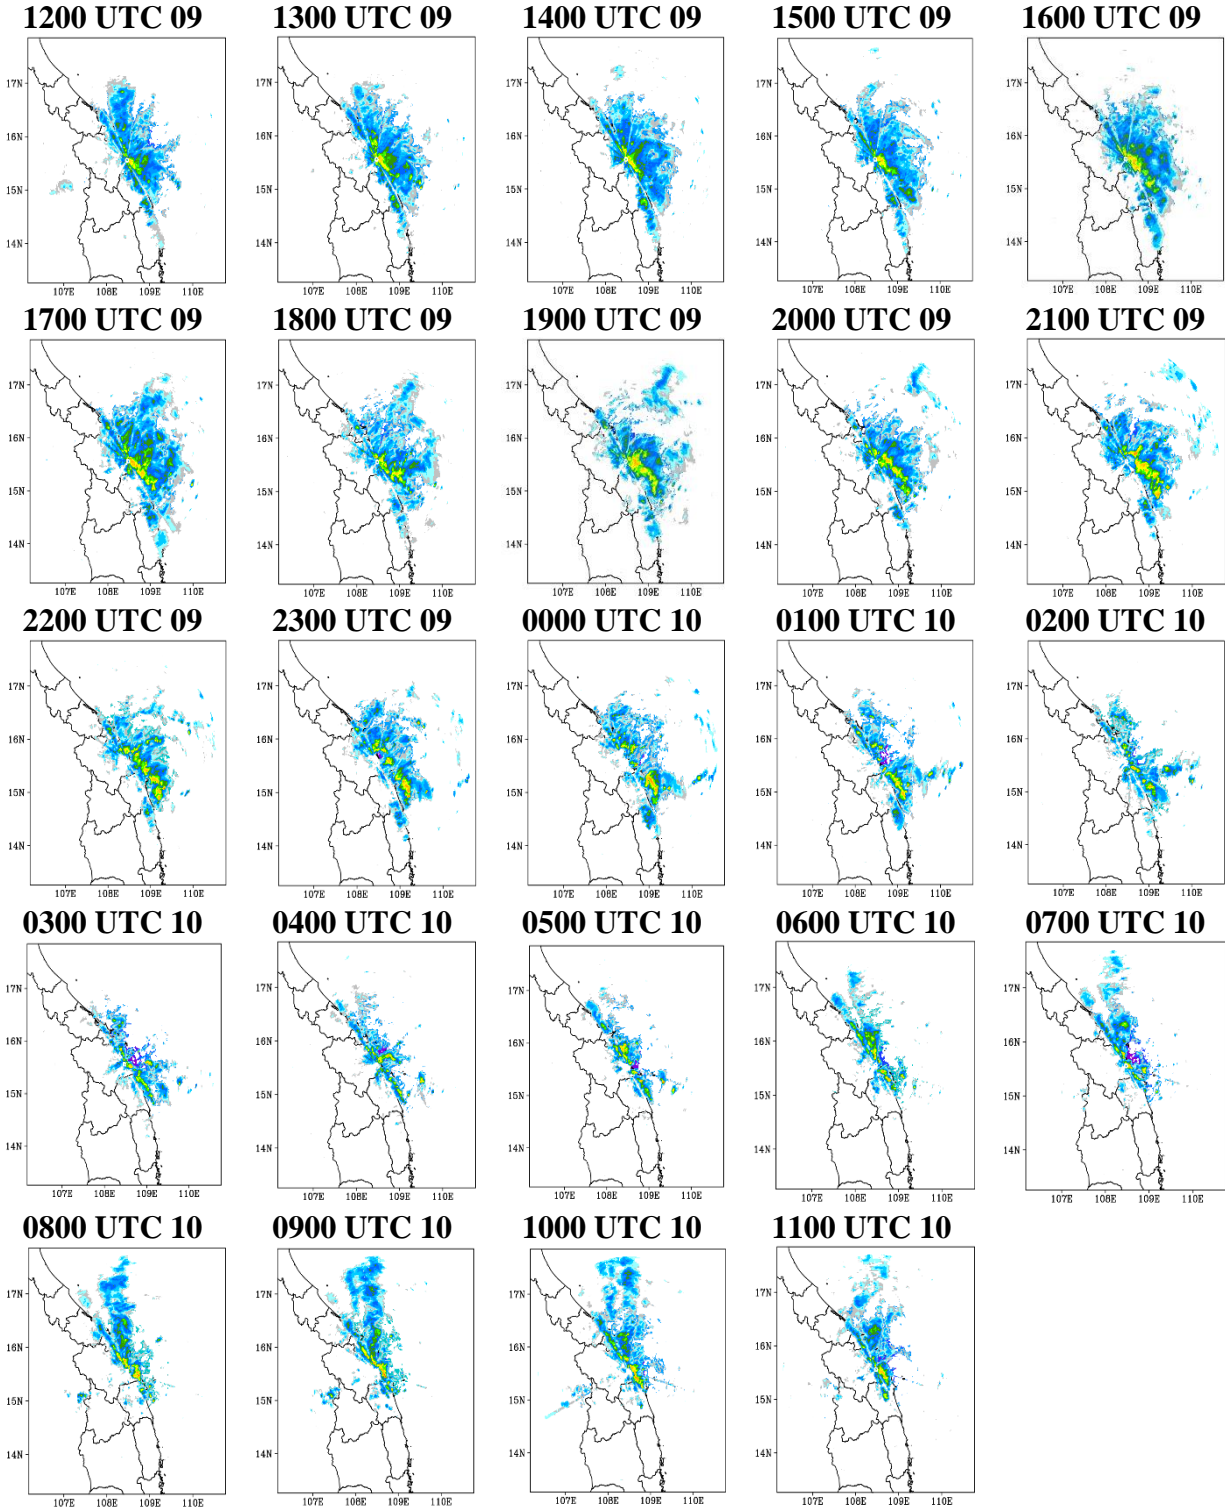

599

600 **Figure S4.** As in Fig. S2, except from 1200 UTC 9 to 1100 UTC 10 Dec 2018.



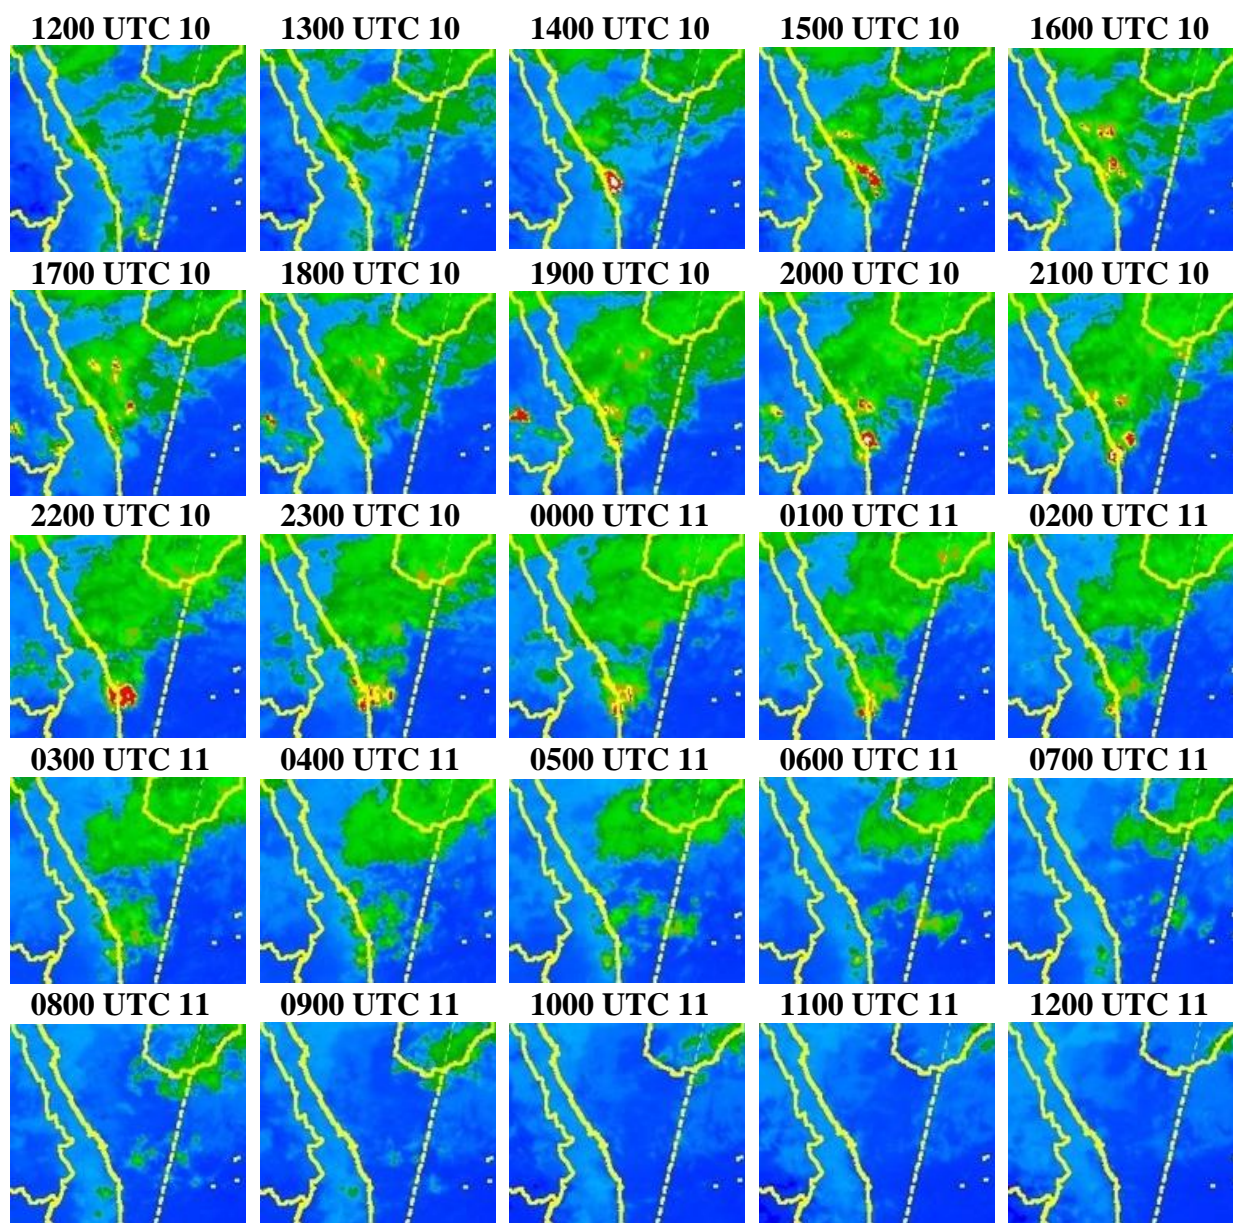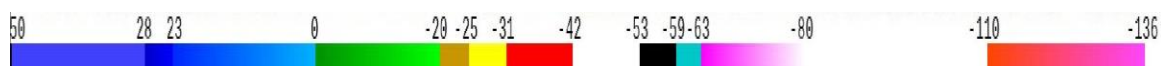

**Figure S5.** As in Fig. S1, except from 1200 UTC 10 to 1200 UTC 11 Dec 2018.

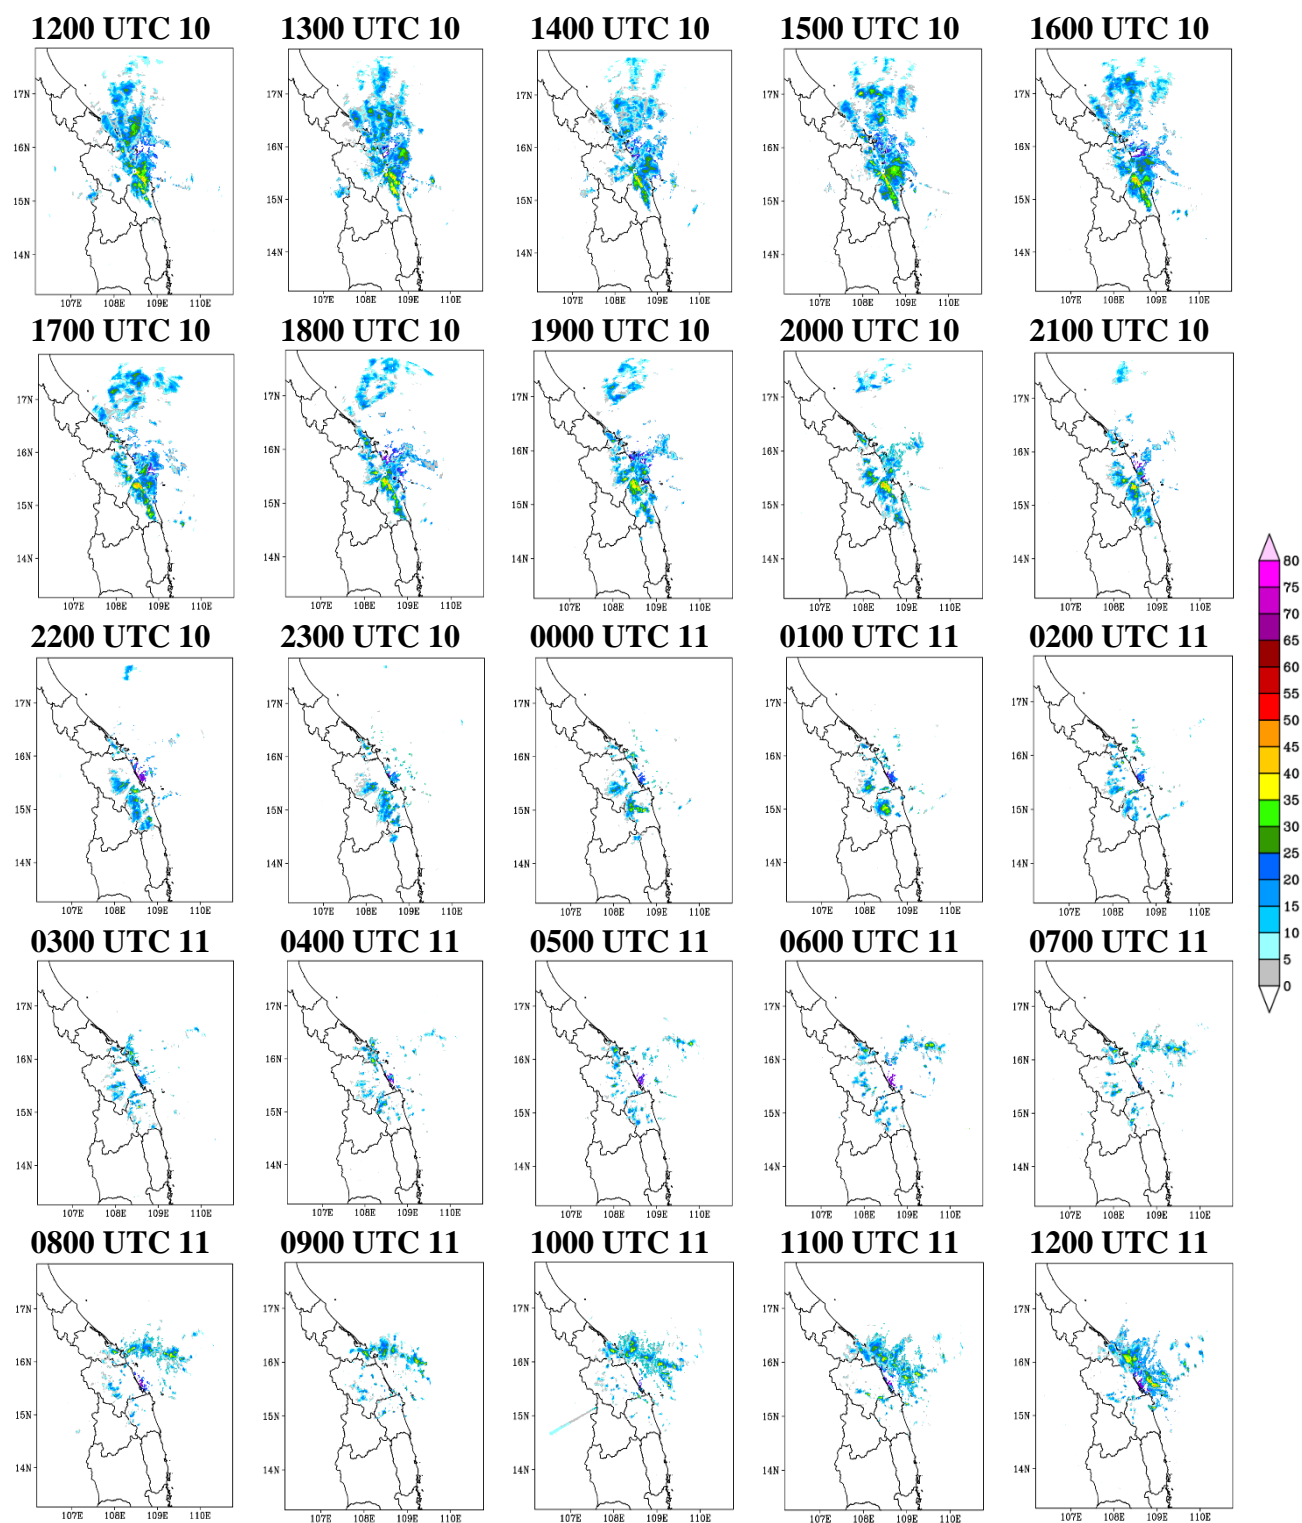

**Figure S6.** As in Fig. S2, except from 1200 UTC 10 to 1200 UTC 10 Dec 2018.
